# Supplementary material
Source: PubMed Central journal article supplement (PMC3966700)

**Supplemental Table 1. Gene Sets Altered in LIRKO livers**

| RANK | NAME                                      | FDR q-val |
|------|-------------------------------------------|-----------|
| 1    | CHOLESTEROL_BIOSYNTHESIS                  | 0.000     |
| 2    | BIOSYNTHESIS_OF_STEROIDS                  | 0.000     |
| 3    | GLYCINE_SERINE_AND_THREONINE_METABOLISM   | 0.000     |
| 4    | PROTEASOME                                | 0.002     |
| 5    | GAMMA_HEXACHLOROCYCLOHEXANE_DEGRADATION   | 0.007     |
| 6    | AMINOACYL_TRNA_BIOSYNTHESIS               | 0.008     |
| 7    | TRYPTOPHAN_METABOLISM                     | 0.023     |
| 8    | PORPHYRIN_AND_CHLOROPHYLL_METABOLISM      | 0.027     |
| 9    | CIRCADIAN_EXERCISE                        | 0.038     |
| 10   | PENTOSE_PHOSPHATE_PATHWAY                 | 0.067     |
| 11   | UBIQUINONE_BIOSYNTHESIS                   | 0.073     |
| 12   | OXIDATIVE_PHOSPHORYLATION                 | 0.069     |
| 13   | PYRUVATE_METABOLISM                       | 0.064     |
| 14   | GLYCOLYSIS                                | 0.063     |
| 15   | GLUCONEOGENESIS                           | 0.064     |
| 16   | GLYCEROPHOSPHOLIPID_METABOLISM            | 0.064     |
| 17   | NUCLEOTIDE_METABOLISM                     | 0.082     |
| 18   | UBIQUITIN_MEDIATED_PROTEOLYSIS            | 0.109     |
| 19   | VALINE_LEUCINE_AND_ISOLEUCINE_DEGRADATION | 0.111     |
| 20   | GLYCOSPHINGOLIPID_METABOLISM              | 0.148     |
| 21   | N_GLYCAN_BIOSYNTHESIS                     | 0.170     |
| 22   | BILE_ACID_BIOSYNTHESIS                    | 0.185     |
| 23   | HISTIDINE_METABOLISM                      | 0.190     |
| 24   | LYSINE_DEGRADATION                        | 0.190     |
| 25   | ATP_SYNTHESIS                             | 0.229     |
| 26   | BLOOD_CLOTTING_CASCADE                    | 0.241     |
| 27   | FLAGELLAR_ASSEMBLY                        | 0.233     |
| 28   | STARCH_AND_SUCROSE_METABOLISM             | 0.233     |
| 29   | TYPE_III_SECRETION_SYSTEM                 | 0.235     |
| 30   | TYROSINE_METABOLISM                       | 0.232     |
| 31   | GLUTATHIONE_METABOLISM                    | 0.233     |
| 32   | GLOBOSIDE_METABOLISM                      | 0.226     |
| 33   | FRUCTOSE_AND_MANNOSE_METABOLISM           | 0.237     |
| 34   | BUTANOATE_METABOLISM                      | 0.244     |
| 35   | PROPANOATE_METABOLISM                     | 0.247     |
| 36   | CITRATE_CYCLE_TCA_CYCLE                   | 0.241     |
| 37   | ALANINE_AND_ASPARTATE_METABOLISM          | 0.239     |
| 38   | GLYCOLYSIS_AND_GLCONEOGENESIS             | 0.245     |

|    |                                           |       |
|----|-------------------------------------------|-------|
| 39 | UREA_CYCLE_AND_METABOLISM_OF_AMINO_GROUPS | 0.239 |
| 40 | STATIN_PATHWAY_PHARMGKB                   | 0.373 |
| 41 | PHOTOSYNTHESIS                            | 0.410 |
| 42 | METHANE_METABOLISM                        | 0.461 |
| 43 | KREBS_TCA_CYCLE                           | 0.475 |
| 44 | ARGININE_AND_PROLINE_METABOLISM           | 0.512 |
| 45 | CARBON_FIXATION                           | 0.543 |
| 46 | RIBOSOMAL_PROTEINS                        | 0.576 |
| 47 | TRANSLATION_FACTORS                       | 0.575 |
| 48 | PROSTAGLANDIN_AND_LEUKOTRIENE_METABOLISM  | 0.594 |
| 49 | MRNA_PROCESSING_REACTOME                  | 0.586 |
| 50 | GALACTOSE_METABOLISM                      | 0.577 |
| 51 | RNA_TRANSCRIPTION_REACTOME                | 0.588 |
| 52 | BETA_ALANINE_METABOLISM                   | 0.581 |
| 53 | GLYCEROLIPID_METABOLISM                   | 0.654 |
| 54 | PURINE_METABOLISM                         | 0.648 |
| 55 | BIOGENIC_AMINE_SYNTHESIS                  | 0.761 |
| 56 | DNA_REPLICATION_REACTOME                  | 0.832 |
| 57 | RNA_POLYMERASE                            | 0.933 |
| 58 | INTEGRIN_MEDIATED_CELL_ADHESION_KEGG      | 0.946 |

**Supplemental Table 2. Primer Sequences**

| Primer     | Sequence                  |
|------------|---------------------------|
| Srebp-1c-F | GGCCCGGGAAGTCACTGT        |
| Srebp-1c-R | GGAGCCATGGATTGCACATT      |
| Srebp-1a-F | GGCCGAGATGTGCGAACT        |
| Srebp-1a-R | TTGTTGATGAGCTGGAGCATGT    |
| Srebp2-F   | GCGTTCTGGAGACCATGGA       |
| Srebp2-R   | ACAAAGTTGCTCTGAAAACAAATCA |
| Insig1-F   | TCACAGTGACTGAGCTTCAGCA    |
| Insig1-R   | TCATCTTCATCACACCCAGGAC    |
| Insig2a-F  | CCCTCAATGAATGTACTGAAGGATT |
| Insig2a-R  | TGTGAAGTGAAGCAGACCAATGT   |
| Insig2b-F  | CCGGGCAGAGCTCAGGAT        |
| Insig2b-R  | GAAGCAGACCAATGTTTCAATGG   |
| Hmgcr-F    | CTTGTGGAATGCCTTGTGATTG    |
| Hmgcr-R    | AGCCGAAGCAGCACATGAT       |
| Fdps-F     | ATGGAGATGGGCGAGTTCTTC     |
| Fdps-R     | CCGACCTTTCCCGTCACA        |
| Fdft1-F    | CCAACCTCAATGGGTCTGTTCCCT  |
| Fdft1-R    | TGGCTTAGCAAAGTCTTCCAACCT  |
| Cyp51-F    | AGCTGTACGCAGACCTGGAT      |
| Cyp51-R    | ACGCCCGTCCTTGTATGTAG      |
| Ldlr-F     | GAGGAGCAGCCACATGGTAT      |
| Ldlr-R     | GCTCGTCCTCTGTGGTCTTC      |
| 18S-F      | GTAACCCGTTGAACCCATT       |
| 18S-R      | CCATCCAATCGGTAGTAGCG      |
| Pcsk9-F    | CCCCATGTGGAGTACATTGA      |
| Pcsk9-R    | GTGGAAGCGTGTCCCATC        |
| Idol-F     | ACCGCCAATACAGCTATGA       |
| Idol-R     | GTTCTCCATCGCTGACACAA      |
| Fasn-F     | GCTGCGGAAACTTCAGGAAAT     |
| Fasn-R     | AGAGACGTGTCACTCCTGGACTT   |
| Scd1-F     | CATCATTCTCATGGTCCTGCT     |
| Scd1-R     | CCCAGTCGTACACGTCATTT      |

## Supplemental Information

**Supplemental Figure S1.** *Statin/ezetimibe treatment lowers HDL and non-HDL cholesterol in LIRKO mice.* LIRKO and control mice were fed a diet with or without supplementation with statin/ezetimibe (**S/E**, 0.1% Lovastatin and 0.025% ezetimibe) for one week. Equal amounts of serum were pooled from four to six mice from each group, and subjected to FPLC fractionation. Cholesterol was measured in each fraction.

# Supplemental Figure S1

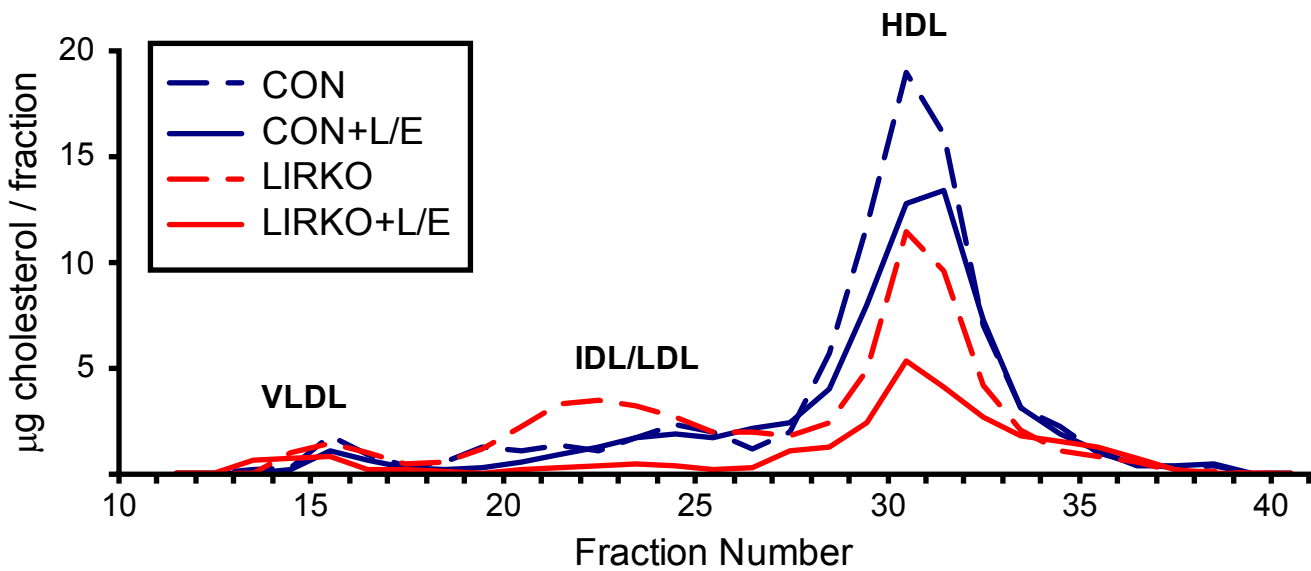

Supplement: supp_M043711_jlr.M043711-1.pdf [file supp_M043711_jlr.M043711-1.pdf]
